# Supplementary material for: Liquid crystal droplets functionalized with charged surfactant and polyelectrolyte for non-specific protein detection
Source: Royal Society of Chemistry journal article supplement (doi:10.1039/c5ra15647e), 2015-01-01
Supplement: c5ra15647e1.pdf [file c5ra15647e1.pdf]

## Supplementary Information

# Liquid crystal droplets functionalized with charged surfactant and polyelectrolyte for protein detection

Lei Yang, Mashooq Khan, and Soo-Young Park\*

School of Applied Chemical Engineering, Department of Polymer Science and Engineering,  
Kyungpook National University, #1370 Sangyuk-dong, Buk-gu, Daegu 702-701, Korea

\*Corresponding author e-mail: [psy@knu.ac.kr](mailto:psy@knu.ac.kr)

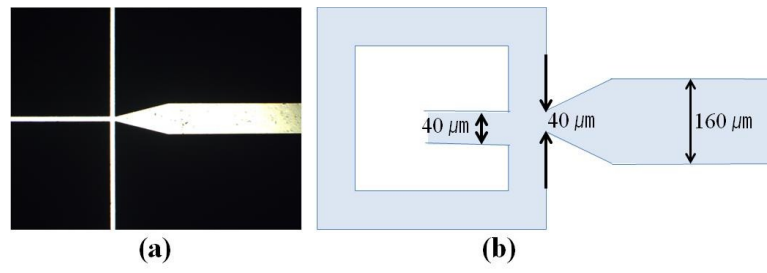

**Figure SI 1.** (a) Camera image and (b) schematic diagram showing the dimensions of the microfluidics channels.
